# Supplementary material
Source: PubMed Central journal article supplement (PMC3820841)
Supplement: NIHMS523323-supplement-Supplementary_Table_1.pdf [file NIHMS523323-supplement-Supplementary_Table_1.pdf]

**Supplemental Table 1. Primers used in analysis of HPV transcription and genome copies**

| Primer   | Sequence (5' to 3') <sup>a</sup> | Strand    | Nucleotide position(s) <sup>a</sup> | ORF(s) <sup>b</sup> | Product length (bp) <sup>c</sup> | Amplification Efficiency <sup>d</sup> |
|----------|----------------------------------|-----------|-------------------------------------|---------------------|----------------------------------|---------------------------------------|
| 16QE6A   | GAACAGCAATACAACAACCG             | Sense     | 368-388                             | E6                  | 132                              | 1.96                                  |
| 16QE6B   | CCACCGACCCCTTATATTATG            | Antisense | 479-499                             | E6                  |                                  |                                       |
| 16QE6.2A | GCAACAGTTACTGCGACGTG             | Sense     | 205-224                             | E6*                 | 176                              | 1.95                                  |
| 16QE6.2B | CAACAAGACATACATCGACCG            | Antisense | 502-522                             | E6*                 |                                  |                                       |
| 16QE7A   | CAGCTCAGAGGAGGAGGATG             | Sense     | 651-670                             | E7                  | 114                              | 1.93                                  |
| 16QE7B   | CACAACCGAAGCGTAGAGTC             | Antisense | 745-764                             | E7                  |                                  |                                       |
| 16QE1E4A | CCATCTGTTCTCAGAAACCAT            | Sense     | 836-856                             | E1^E4               | 90                               | 1.94                                  |
| 16QE1E4B | GGCCAAGTGCTGCCTAAT               | Antisense | 3385-3402                           | E1^E4               |                                  |                                       |
| 31QE6A   | GCTCGGCATTGGAAATACCC             | Sense     | 154-173                             | E6                  | 137                              | 2.02                                  |
| 31QE6B   | CTCCGTGTGGTGTGTCGTCC             | Antisense | 272-291                             | E6                  |                                  |                                       |
| 31QE6.2B | TGCTATGCAACGTCCTGTCC             | Antisense | 502-521                             | E6*                 | 164 <sup>e</sup>                 | 2 <sup>e</sup>                        |
| 31QE7A   | ATGAGCAATTACCCGACAGC             | Sense     | 633-652                             | E7                  | 182                              | 2.02                                  |
| 31QE7B   | AGCCATTAACAGCTCTTGC              | Antisense | 796-815                             | E7                  |                                  |                                       |
| 31QE1E4A | GGCTCATTTGGAATCGTGTGC            | Sense     | 812-832                             | E1^E4               | 167                              | 1.99                                  |
| 31QE1E4B | CTTCACTGGTGCCCAAGG               | Antisense | 3395-3378                           | E1^E4               |                                  |                                       |
| QTBPA    | CACGGCACTGATTTTCAGTTCT           | Sense     | 868-889                             | TBP                 | 80                               | 2.1                                   |
| QTBPB    | TTCTTGCTGCCAGTCTGGACT            | Antisense | 968-947                             | TBP                 |                                  |                                       |
| 16QLCRA  | TTCCTGACCTGCACTGCTTG             | Sense     | 7567-7586                           | LCR                 | 129                              | 1.96                                  |
| 16QLCRB  | CAGCGGTATGTAAGGCGTTG             | Antisense | 7676-7695                           | LCR                 |                                  |                                       |
| 31QLCRA  | GGTGTACGCCATAGTAAAAG             | Sense     | 7384-7404                           | LCR                 | 168                              | 2.01                                  |
| 31QLCRB  | GGAAACCAAAAACCGCAGAAC            | Antisense | 7531-7551                           | LCR                 |                                  |                                       |
| QGAPDHA  | GAGAGACCCCTCACTGCTG              | Sense     | 1052-1070                           | GADPH               | 136                              | 1.98                                  |
| QGAPDHB  | GATGGTACATGACAAGGTGC             | Antisense | 1268-1287                           | GADPH               |                                  |                                       |

<sup>a</sup> Corresponding to the sequence and numbering of HPV16 (GenBank accession number: K02718), HPV31 (GenBank accession number: J04353), TBP (GenBank accession number: M55654), or GAPDH (GenBank accession number: NM\_002046).

<sup>b</sup> Open read frame (ORF) or region of specified gene.

<sup>c</sup> Amplicon length in base pairs.

<sup>d</sup> Actual amplification efficiency of PCR by calculation according to Q-Gen software (32).

<sup>e</sup> Sense primer used in this PCR is 31QE6A

## Supplemental Figure Legend

**Supplemental Figure 1. Genomic organization of HPV16 and HPV31 including general structures of the polycistronic early transcripts.** The circular genome of  $\approx 7900$  base pairs is linearized at the late polyadenylation (polyA) signal to illustrate the long control regulatory region (LCR), open reading frames (ORFs), and main early mRNAs (A-E). Nucleotide numbering is below the thin horizontal rule (based on HPV16 [GenBank accession number: K02718], HPV31 [GenBank accession number: J04353]). Bent arrows mark the major early and late promoters. Early and late polyA sites are indicated. Shaded boxes illustrate ORFs located in all three reading frames for each viral genome aligned with the polycistronic early transcripts (A-E). Each of the primer pairs for qPCR is represented by a node and the products as lines connecting each primer node. Long vertical lines demark the boundaries of the ORFs and the E6\* and E1<sup>E4</sup> introns are shaded the length of the figure. Note that when the amplification products span introns, only spliced RNAs are amplified as the PCR cycle profile does not amplify >200 bp (verified by gel electrophoresis). The specificity of the products and their sizes is given for each (LCR, E6, E6\*, E7, E1<sup>E4</sup>). (A-E) Thick black lines represent noncoding sequences and thin lines represent introns.
