# Supplementary material
Source: PubMed Central journal article supplement (PMC3820841)

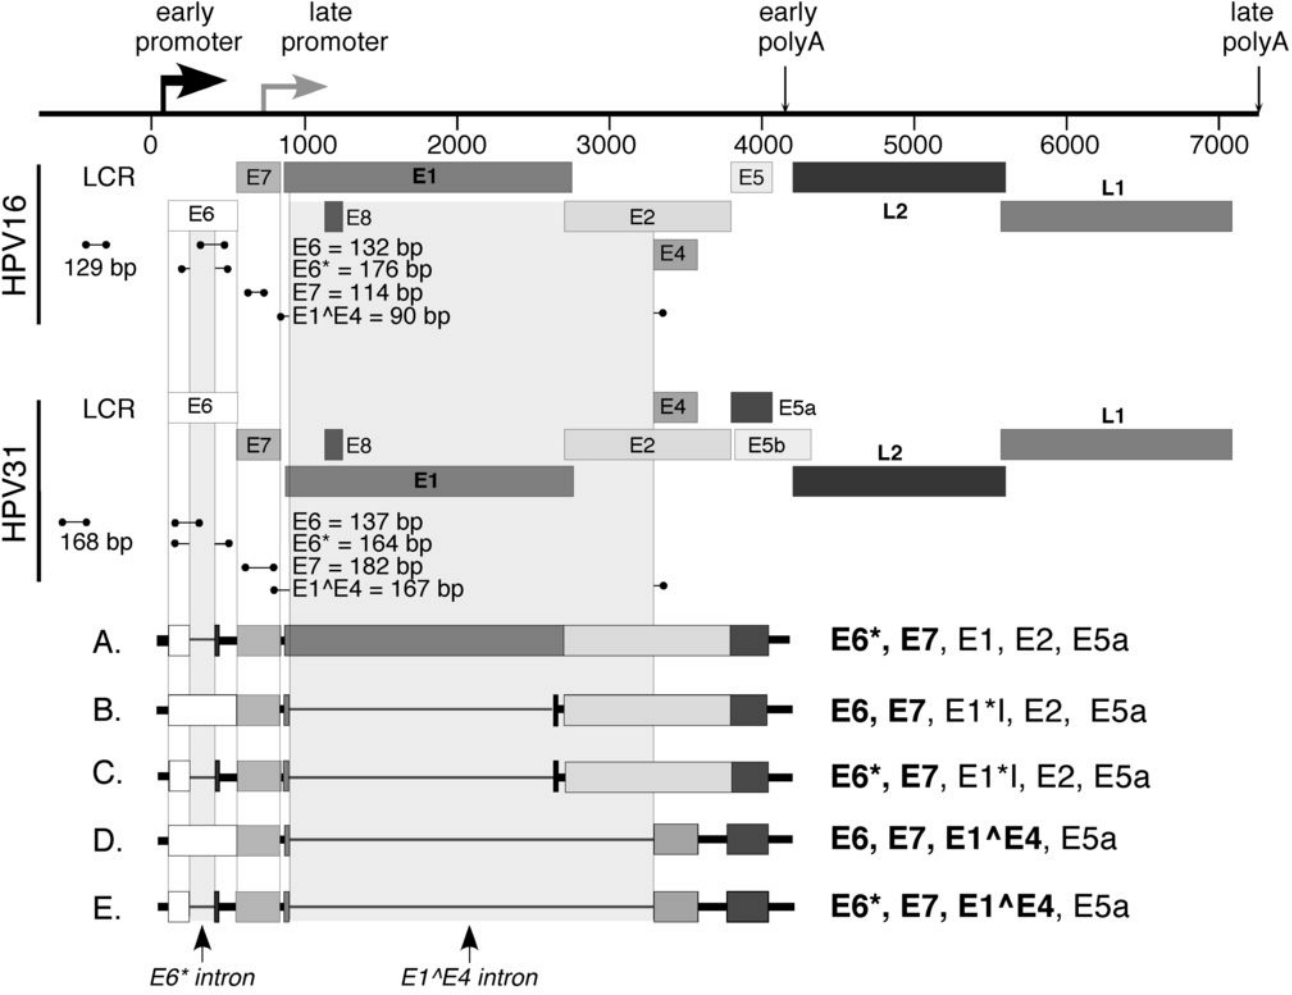

Supplement: NIHMS523323-supplement-Supplementary_Figure_1.pdf [file NIHMS523323-supplement-Supplementary_Figure_1.pdf]
